## Gpr177 regulates pulmonary vasculature development

Ming Jiang, Wei-yao Ku, Jiang Fu, Stefan Offermanns, Wei Hsu and Jianwen Que

There was an error published in *Development* **140**, 3589-3594.

A mouse strain was incorrectly described. *Axin2-lacZ* should be *TOPGAL* on p. 3589 in the first section of the Materials and methods and on p. 3590, right column, line 6, and in Fig. 1A,B and legend. The corrected Fig. 1 appears below. The conclusions drawn from the results are unaffected by this error.

The authors apologise to readers for this mistake.

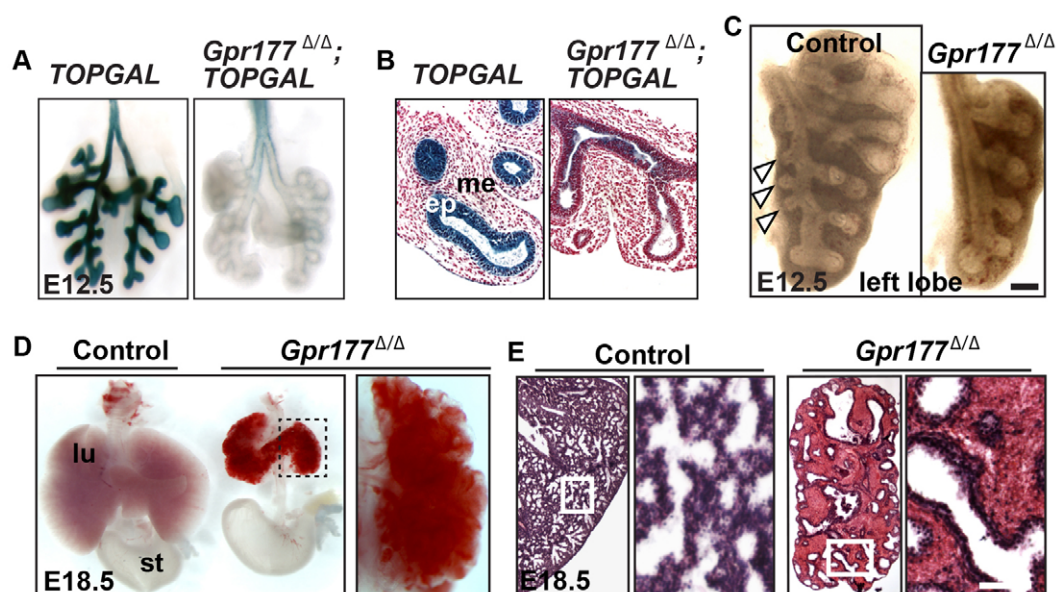

Source: https://cob.silverchair.com/dev/article-pdf/140/19/4117/1160537/4117.pdf
